# Supplementary material for: Dynamics of flavonoid metabolites in coconut water based on metabolomics perspective
Source: Front Plant Sci. 2024 Oct 7;15:1468858. doi: 10.3389/fpls.2024.1468858 (PMC11491327; doi:10.3389/fpls.2024.1468858)
Supplement: Supplementary file 1 [file Table1.xlsx]

## Sheet: Sheet1
Table S1-Statistical table of flavonoid metabolites
Index	Compounds	Class I	Class II	CK2-1	CK2-2	CK2-3	CK4-1	CK4-2	CK4-3	CK6-1	CK6-2	CK6-3	CK8-1	CK8-2	CK8-3	CK10-1	CK10-2	CK10-3	CK12-1	CK12-2	CK12-3	W5-2-1	W5-2-2	W5-2-3	W5-4-1	W5-4-2	W5-4-3	W5-6-1	W5-6-2	W5-6-3	W5-8-1	W5-8-2	W5-8-3	W5-10-1	W5-10-2	W5-10-3	W5-12-1	W5-12-2	W5-12-3
pme3137	3-Hydroxyflavone	Flavonoids	Flavonols	243.05	1507.9	428.97	2745.3	10606	3805.2	5459.5	4952.7	10062	4846.6	4674.3	3959.6	3837	6378	2868.3	7682.7	7834	2249.4	8978.2	7070.9	8823.9	6548.7	5035.6	9120.8	3968.6	11124	4750.6	1559.1	1673.9	1295.4	974.16	737.42	1288	531.42	1114.9	2291.3
mws1422	Epiafzelechin	Flavonoids	Flavanols	779390	698810	667880	321660	308210	324050	271040	538710	378410	137290	203110	135550	5302.3	11357	4497.3	672.51	4524	758.74	144210	110250	184180	54517	45562	61458	37593	51261	38861	2297.2	758.57	4616.7	6061.9	9873.7	15184	8689.3	17942	15933
pme3285	Afzelechin (3,5,7,4'-Tetrahydroxyflavan)	Flavonoids	Flavanols	308580	285800	165980	122290	98027	110110	124140	164390	134260	50740	69015	56329	4061	6001.5	10714	2667.3	1992.5	2000	59490	58820	76197	52787	55247	39999	4697	12793	2019.3	1367	2049.5	1367.3	2061	1358.7	4059	5468.1	3397.2	1377.8
Lmsp004137	3,4,2',4',6'-Pentahydroxychalcone	Flavonoids	Chalcones	1060200	952100	727510	401730	320840	392460	274550	407370	395410	200690	251540	198320	8652	10406	7900.7	4381.1	3746.7	9021.9	94696	161800	139510	82312	66154	31685	78724	129680	99585	9385.5	9	22809	39954	22664	31516	20881	31671	26857
MWSHY0167	Catechin	Flavonoids	Flavanols	41802000	40947000	32932000	12611000	11255000	13277000	11285000	15946000	14438000	7559800	10574000	6875400	171550	235430	253670	67909	98858	80970	10123000	9530600	10392000	6688600	7195500	6513600	4747300	8462200	7470100	752230	142100	1075500	2392800	1707200	3758400	607880	783100	679250
MWSHY0174	Epicatechin	Flavonoids	Flavanols	41368000	40190000	31617000	19040000	17283000	19895000	16541000	24020000	19545000	8954500	12178000	5047700	184830	223620	285450	132200	168680	178050	10372000	11020000	11850000	5337800	5426600	5089500	5256000	8156700	7859000	717650	132190	1034900	1211400	864380	1730500	785840	689420	743630
Lmcp004693	Kaempferide (3,5,7-Trihydroxy-4'-methoxyflavone)	Flavonoids	Flavonols	9943.5	7765.5	8558.8	20130	19175	18050	10826	15151	12276	6799.6	13599	7954.3	9	1176.6	1587	509.82	9	9	17567	22409	8524.8	8929.7	14415	14431	10402	4881	7956.7	1208.3	508.49	539.29	9	9	489.68	1089.1	1207.9	1766.6
Zmhp002714	5,6,7-Tetrahydroxy-8-methoxyflavone	Flavonoids	Flavones	9844.6	10376	11056	23633	20021	35618	17887	27513	19139	12564	16113	7041.2	3869	4669.5	1753.4	856.09	853.43	844.42	28075	21926	38158	24274	18991	22785	2564.9	5940.8	7982.4	418.75	9	4225.6	4268.9	2237.6	1238.5	2607	4614.8	2986.6
Zmhn003257	5,7,2'-Trhiyroxy-8-methoxyflavone	Flavonoids	Flavones	43178	45907	41975	411.12	517.2	825.79	1548.9	311.22	721.02	205.08	623.46	736.26	308.28	310.14	307.8	414	12709	1052.6	930.92	2849.5	256.38	255.96	624.32	207.48	102.3	205.44	512.52	18359	24205	769.75	19191	18857	45962	158610	132050	134800
Zmhp003514	6,7,8-Tetrahydroxy-5-methoxyflavone	Flavonoids	Flavones	19069	21585	24832	478.25	476.04	491.09	157.62	473.75	280.38	160.8	159.21	314.88	329.57	1272.8	661.85	329.22	5131.7	160.98	631.36	476.93	160.8	399.86	160.8	497.42	318.6	135.27	165.32	7904.5	2262.1	1948.9	13048	8856.9	14318	75785	66459	68380
pmc1990	4'-Hydroxy-5,7-dimethoxyflavanone	Flavonoids	Flavanones	176850	187680	150100	128580	119970	216640	206290	156650	164490	246270	202090	210610	143100	165770	138420	148390	179000	164580	95742	128370	154240	143420	145560	157650	200980	150180	190650	254540	280950	162440	155740	183120	172650	88598	104050	106070
mws0044	Taxifolin(Dihydroquercetin)	Flavonoids	Flavanonols	185740	161660	188890	26020	32159	12530	9297.1	15098	5699.5	2784.2	3710.2	5592.9	13818	17303	8199.9	13118	9156.8	15027	15942	17121	11649	6710.4	7644.1	6207.1	955.38	4303.5	1965.2	417.75	1864.9	456.54	946.14	1475.5	8191.7	19556	33237	37696
Lmmp003109	3'-O-Methyl-epicatechin	Flavonoids	Flavanols	34426	32082	37278	20802	32752	25393	25125	17519	10220	11710	24373	7657.5	2032.9	10437	5630.7	1053.9	4730.3	7559.1	27721	34116	23019	13672	15605	7247.4	14542	36286	31316	717.45	3664.4	3602.6	31190	22428	40569	9174.5	3227.7	11550
mws0049	Gallocatechin	Flavonoids	Flavanols	75384	85783	42407	12171	13262	13834	11472	18579	10413	7622.2	12538	8362.3	9	9	9	9	9	9	29837	35331	34045	6474.9	4700.1	4307	6126.2	12661	11276	9	9	9	9	9	9	9	9	9
MWSHY0151	Quercetagetin; 3,3',4',5,6,7-Hexahydroxyflavone	Flavonoids	Flavonols	1310	1278.8	1134.3	661	679.65	2102.5	8691.7	5862.7	1310.3	9825	14243	5895	23668	37671	44388	22260	26293	20241	8421.3	5280	3312.3	2667.2	5391.7	989.5	5116.9	5437.2	7622.4	3207.9	1176.3	2006.3	21406	23539	42422	49711	68310	50434
pmb3031	Tricin-4'-O-glycerol	Flavonoids	Flavones	23352	25369	34628	3198.2	1416.9	147.38	465.36	3416.9	2317.5	311.81	462.75	1082.2	486.16	620.63	9	459.52	154.43	326.95	1448.2	1458.5	972.59	955.39	338.95	145.64	460.3	639.75	155.9	303.46	309.11	300.67	156.16	625.5	1843.4	2611	1116.6	773.41
Lmjp003402	2'-Hydroxy-3,4,5,3',4',6'-hexameth-oxychalcone	Flavonoids	Chalcones	1935.1	370.1	593.4	6185.9	10936	9377.4	9593	5959.7	11484	11980	8777.5	6739.1	4171.9	4742.1	4088.8	4767.3	14392	5006.8	10930	14532	8747.7	9463.2	6132.6	12530	4996	18462	8009.4	4403.4	1714.3	809.4	373.6	298.49	448.55	1039.3	676.65	1054.7
Lmyp005841	Chrysin-7-O-glucoside	Flavonoids	Flavones	781340	664070	731100	47084	37928	36709	27277	31358	16916	8171.9	14843	4197.4	2086.5	1774.2	1144.2	831.49	1035	2097.5	24460	19825	36602	35401	36213	39987	3969.1	6156.7	5354.8	3053	6057.3	3795.7	773.07	2925.5	3186.9	3965.4	2742.2	2511.2
HJAP012	Luteolin-8-C-arabinoside	Flavonoids	Flavonoid carbonoside	14979	12783	2993.9	5269	4859.4	14260	1285.5	1506.5	5232.7	4500	3771.1	2983.3	10534	46550	27735	59722	63742	45033	6749.3	3057.9	8307.6	8272.2	1398	3741	9037.6	4885	4542.3	2245.5	750.58	750.75	28129	19557	21951	56263	90124	56460
MWSHY0189	Apigenin-7-O-glucoside(Cosmosiin)*	Flavonoids	Flavones	17228000	15100000	16145000	12479000	10550000	11385000	5506400	7651900	6415800	5157800	6844300	4885300	40235	30727	84336	21488	29569	28481	7818700	7626900	8693200	7599100	7633600	7132500	1895400	2519600	2712300	768200	126220	1013200	30420	6076.8	26552	36735	43724	56716
MWSHY0181	Apigenin-8-C-Glucoside (Vitexin)	Flavonoids	Flavonoid carbonoside	248180	268990	259260	108510	73645	94753	50324	92466	97797	57352	69456	51672	15408	15050	21733	4516	3804.9	10521	292580	326120	379800	21901	39789	47610	18877	37902	25040	2870.2	2248.7	5357.4	21811	22594	72981	37624	28065	33155
MWS20148	Apigenin-4'-O-glucoside*	Flavonoids	Flavones	14881000	15499000	12559000	11949000	9838400	10774000	4791800	7611500	6183900	4475600	6185700	4408700	18681	35887	39386	11171	40474	46358	6942900	7240300	7861900	6996200	6958000	6591000	1623800	2261100	2441200	644560	203970	832810	40593	20273	36463	31775	45167	77664
MWSHY0008	Apigenin-6-C-glucoside (Isovitexin)	Flavonoids	Flavonoid carbonoside	264570	281310	289460	117290	119120	118220	79237	141980	104430	40533	75904	58522	6022.1	4528.3	9739.5	6398.2	3797.3	3759.8	350780	475600	525290	49741	75979	69705	18134	40867	38691	6795	5253.7	8339.7	12031	21064	60755	15047	17420	17281
pmp000117	3,5,6,7,8,3',4'-Heptamethoxyflavone	Flavonoids	Flavonols	21953	1339.7	3823.4	2212.4	931.43	3063.6	1656.9	1241.3	2073.4	1035.9	1546.9	2678.3	1744.6	2573.6	797.75	967.47	940.02	2974.4	8336.6	8618.7	5831.2	2582.4	1854.6	2356.4	726.48	3204.3	3902.9	2684.1	1648.7	2547.1	3954.7	3097.3	3798.9	2139.2	3188.7	5526.8
pme1611	Isohemiphloin	Flavonoids	Flavonoid carbonoside	25724	26086	33116	23623	27535	19495	13816	33130	19361	12395	7781.7	10556	3348	8746.4	8219.8	1659.5	4419.9	2809.9	24227	19561	10334	4953.8	17041	8898.1	7241.8	30634	16638	6592.7	2085.5	5557.8	7470.3	8869.1	7166.8	12170	11116	17965
mws1179	Naringenin-7-O-glucoside (Prunin)	Flavonoids	Flavanones	184180	152310	192280	134550	118010	44219	30842	50503	42270	93207	120230	106660	370.13	1968.4	3430.1	884.11	5770.6	4834.3	45926	52866	28992	35461	42522	26480	11558	10367	16675	2114.9	1116.5	6773.9	4433.3	3460.5	2952.6	21507	16678	19028
HJN087	Naringenin-4'-O-glucoside	Flavonoids	Flavanones	1493500	1532800	1479300	1158700	1107500	478740	208010	347950	323530	868890	1054700	829200	13860	8094.2	13983	8920.4	2487.7	4650	407930	417400	434150	243860	316830	288410	50467	121320	112280	37150	30375	34047	2987.6	7168.9	10849	31431	35905	49792
Lmfn004093	Phloretin-4'-O-glucoside (Trilobatin)	Flavonoids	Chalcones	8726000	6650700	6017500	1044500	1200400	265060	431070	889020	782030	224680	355810	192400	170690	152100	204890	132940	107170	139550	339080	333780	239210	194620	274400	217380	69271	139480	103110	14325	4614.8	15293	31465	34287	108760	195360	204510	238400
MWSHY0020	Epicatechin gallate	Flavonoids	Flavanols	9	9	7701.6	20010	764.4	1525.1	9	2291	12286	776.06	9	9	3729.9	4533	3747.5	5239.1	2241.5	9	21446	5320	9851.8	7739.2	5379.9	12991	761.4	1536.4	2241.5	2273.2	9	2287	14441	1530.8	5294.2	1554.4	10673	1530.8
pmp000573	Acacetin-7-O-galactoside*	Flavonoids	Flavones	1426400	1147600	1300200	135380	124520	186770	17960	34750	36248	4073.6	6703.7	3117	652.07	862.53	1955.3	647.12	1442.5	378.05	19137	19771	21673	15420	22360	18883	2223.4	5356.2	755.46	218.27	1175.6	2366.9	1078.5	2470	654.03	1093.7	963.25	653.25
pmp000575	Acacetin-7-O-glucoside (Tilianin)*	Flavonoids	Flavones	315660	278580	271750	303790	262510	297420	34406	62781	58286	22068	30215	19157	4580.6	5076.3	3189.9	1171.3	2572.1	497.75	29150	32694	25781	27628	25421	21752	1593.4	611.38	1780.5	2400.2	411.81	1199.9	831.54	773.14	1795	4981.8	2517.5	2998.7
mws1299	Luteolin-8-C-glucoside (Orientin)*	Flavonoids	Flavonoid carbonoside	88680	70905	259850	101990	62427	70475	59331	130560	60074	25488	35759	47584	3387.7	10865	14814	3555.3	13919	22629	142480	123040	113860	30110	23525	56605	7436.3	5462.5	13833	54089	650.35	10152	6351.7	3961.4	21749	8149.7	35603	5080.2
Hmpp003270	Luteolin-4'-O-glucoside	Flavonoids	Flavones	148240	101700	104400	161820	115010	124140	72711	109240	98080	44058	73967	20345	6549.3	13079	9760.7	652.25	12971	3867.1	371960	327550	378180	225620	260670	202140	29092	37001	42128	2631	5354	7947	1644	5570	5194	4809.6	24439	29858
mws0089	Kaempferol-7-O-glucoside*	Flavonoids	Flavonols	77340	74944	67390	109090	68668	41530	14069	51936	24137	10858	23994	28144	2896	5347.4	4285.1	1600.8	1379.3	7741.4	181750	162240	120330	87912	95811	89900	17103	19290	22836	6126.9	7820	6640.9	16573	5066.1	31937	3048.4	900.02	9301.8
MWSHY0136	Kaempferol-3-O-glucoside (Astragalin)*	Flavonoids	Flavonols	103280	74649	113530	178740	140090	145430	63396	148760	74198	73741	38669	51719	17343	22189	3393.4	3770.5	1873.7	18738	371590	313250	361920	190940	189240	129010	44205	49220	61611	9573.6	7379.2	16257	18789	5947	2474.7	2257.9	20826	28149
mws0913	Kaempferol-3-O-galactoside (Trifolin)	Flavonoids	Flavonols	33418	47497	47513	4988.8	5015.5	2752.2	8907.5	23802	16070	17642	14883	8348.8	1940.6	6602	5002.5	11063	9937	8743.8	49081	37355	13850	16769	48229	27913	4956.3	29070	18427	7313.5	8741.8	2191.5	15425	6043.1	13327	5490.3	12164	20198
MWS20150	Luteolin-7-O-glucoside (Cynaroside)	Flavonoids	Flavones	226100	285150	39904	17725	42230	35635	20592	61110	30484	55044	15417	15121	7743.1	4162.8	6152.7	44888	20968	3556	24878	15334	30708	20836	12757	14329	6203.8	7739.9	16285	4645	652.88	18571	776.06	6967.8	9153	17584	32643	1168
MWS20147	Luteolin-3'-O-glucoside	Flavonoids	Flavones	329500	195630	321490	402010	332310	288290	118910	136650	164220	76244	112340	89442	5264.2	14715	8493.3	3130	8313.7	3706.8	259560	144480	284310	174930	176540	141060	31948	70350	31283	17923	9336.9	16150	2598	4264.3	3850.6	19804	8420.8	20606
MWSHY0016	Luteolin-6-C-glucoside (Isoorientin)*	Flavonoids	Flavonoid carbonoside	47463	55032	211130	76894	45987	44634	37596	92789	47116	16408	20587	31598	6807.4	6137	11012	7446	14159	12971	82479	88811	62624	27285	18182	37908	2049	7347.7	12085	34161	3717	8118.3	3090.5	6837.7	25748	16246	41276	793.2
HJN086	Eriodictyol-3'-O-glucoside	Flavonoids	Flavanones	114270	82912	99973	50540	31500	18736	10946	17889	7485.9	22945	27655	14608	318.41	2203.9	9	884.11	2860.7	725.94	45646	34281	57182	18058	30979	34060	11810	14483	13962	4687.5	7617.9	3163.2	1451.5	1914.2	2969.7	1370.5	4111.5	3448.9
Lmtn002796	Aromadendrin-7-O-glucoside	Flavonoids	Flavanonols	4997900	4220800	4605900	1044500	1147200	642130	636030	942730	932730	462760	682250	491820	21430	34037	37498	28570	26785	31082	975570	1047700	864140	190740	276240	281830	450180	629860	730320	52063	51910	57954	116890	102740	202510	140250	141810	150500
pmb3023	Eriodictyol-8-C-glucoside	Flavonoids	Flavanones	2483200	2491100	2775800	633830	503870	306470	273970	404660	464050	206320	292700	246630	13497	15411	17488	12919	12646	22896	456690	599570	453840	110810	147780	111640	182790	353870	280080	19045	20250	21212	55062	41334	115170	86597	62849	65428
HJN041	Epicatechin glucoside	Flavonoids	Flavanols	1060200	875890	962380	380750	364620	322970	110630	132920	148900	174660	182480	143280	14095	10170	29509	15298	16928	12417	136540	158610	171150	146310	166630	136050	67020	92632	110000	22237	23577	20851	16471	5716.8	6816.5	53191	51814	73940
Zmdn002400	Epicatechin-3'-O-β-D-glucopyranoside	Flavonoids	Flavanols	1545100	1342200	1584300	621190	648830	363840	142050	208450	185360	242990	277970	249260	991.44	1239.3	4203.9	1379.2	2099.4	1489	163920	197330	153370	162260	192870	158580	84909	156910	177470	42348	22433	39061	14647	2717.9	1694.7	9338.4	4406.1	17275
mws2220	Gallocatechin 3-O-gallate	Flavonoids	Flavanols	497.67	1008.2	118210	102220	27220	3809	2068.2	6249	1004	4118.9	4631	27529	36164	1032	15884	14458	8078.1	6050.7	34992	10455	4074.3	29227	27169	42093	2621.4	1992.8	8656.8	11726	6083.1	9	46279	3143.3	1551.5	5197.8	97590	7717
pmp000579	Diosmetin-7-O-galactoside*	Flavonoids	Flavones	35076000	31255000	29534000	49620000	45453000	48792000	39973000	51735000	47933000	35460000	45628000	33889000	2196700	2865400	3968600	1498800	1253600	1110700	42057000	40792000	41300000	44241000	44224000	44132000	19030000	30669000	29421000	7531400	1658800	9190100	207620	161100	377240	1642600	1447800	1930800
Hmmp004965	Diosmetin-7-O-glucoside*	Flavonoids	Flavones	34533000	30272000	29832000	50836000	46039000	50420000	38926000	51576000	46162000	36509000	47178000	35387000	2285600	3177700	3955500	1355200	1298500	1201800	41498000	43459000	43884000	45690000	45362000	43393000	19877000	31837000	29892000	7976100	1611000	9785400	214130	203790	411540	1729200	1477100	1882600
Lmjp003655	6-C-MethylKaempferol-3-glucoside	Flavonoids	Flavones	36077000	31712000	30827000	52088000	45869000	50480000	39791000	51266000	48564000	35455000	46342000	34086000	2038200	2705400	3770200	1226300	851010	898820	40015000	41059000	40461000	44209000	44699000	43065000	18362000	30056000	28154000	7488300	1409000	9027800	250870	138550	339210	1410200	1223800	1685600
pmb3012	Chrysoeriol-7-O-glucoside	Flavonoids	Flavones	5992600	6034000	5892300	12776000	15301000	5937800	7235000	13710000	11149000	7935800	9381100	7754400	825150	714730	917820	346930	201020	296140	9074800	10038000	8384400	10124000	10998000	11356000	3808900	7605700	6342300	1419400	1521700	2384600	54665	49488	101980	434690	377580	448490
Hmgp002189	Hispidulin-7-O-Glucoside	Flavonoids	Flavones	33708000	29215000	28544000	50203000	44428000	48396000	37990000	51219000	46289000	35497000	46439000	34802000	2113100	2899000	3892300	1442700	1285700	1123400	40607000	40275000	41943000	44667000	43677000	42477000	18251000	28841000	28821000	7727100	1565000	9338700	243810	181710	423710	1650400	1348600	2063400
Lmdp003286	Isohyperoside	Flavonoids	Flavonols	525020	546680	421020	71315	50118	81573	46242	97143	73620	27334	46990	52250	4887.1	2238.7	9773	50449	11617	23667	57656	43077	63512	17987	19691	24933	9956	23134	22570	2117.5	6838.6	1930.5	2918.9	7581.8	15286	20762	14493	33250
mws1329	Quercetin-7-O-glucoside*	Flavonoids	Flavonols	140430	106740	241320	30269	26137	17199	13260	39450	13874	8876.9	18942	23416	9492	23191	16607	8393.7	19495	28755	67124	30533	29182	9984.8	19437	5271.2	7178.3	8927.8	11782	2156.8	1639	3302.7	5051.8	6129.1	21544	33015	61338	12698
mws0091	Quercetin-3-O-glucoside (Isoquercitrin)*	Flavonoids	Flavonols	155910	166130	225310	40126	39416	12148	22776	41087	22104	14539	24206	22737	13881	16661	18850	3349.3	9416.9	8790	76326	22479	21469	14447	14438	27591	7227.1	11667	23487	6070.7	1093.2	3315.7	8315	3850.9	22191	16646	70265	16976
mws0856	Quercetin-4'-O-glucoside (Spiraeoside)	Flavonoids	Flavonols	151190	144900	184060	48335	34451	18572	24928	47864	19165	20477	32586	37777	15876	26382	20028	10359	12541	52798	94615	11639	19745	19858	14972	16686	14906	1898.7	18663	6857.5	4992	3306.2	11306	7988.7	12261	34834	86122	32444
MWSHY0113	Quercetin-3-O-galactoside (Hyperin)	Flavonoids	Flavonols	563580	496320	425330	92214	100390	130800	52378	88087	66730	50824	60886	44621	13590	4837	14216	41761	19798	10990	85428	63214	64127	28501	11390	17673	22248	34480	29403	8094	3765.6	10405	3534.2	7593.1	11486	7879.6	12604	23921
Lmzp002365	Hesperetin-7-O-glucoside	Flavonoids	Flavanones	1114500	1002300	975610	1809500	1787700	1893900	1333900	1988300	1672800	1212100	1715200	1257200	130610	97924	146690	79381	78251	67641	1603900	1351600	1533900	1747000	1632600	1647100	603800	1054400	1001000	239690	36752	287050	27911	14768	14208	61924	50305	56926
pme1598	Hesperetin-5-O-glucoside	Flavonoids	Flavanones	172970	158770	215940	22299	42640	9998.3	14419	44904	34216	20500	23519	24829	19307	18907	21996	9970	21918	9424.2	62421	34620	15181	7788.9	8906.5	20598	11092	11099	28765	2780.4	3838.1	2734.6	9343.4	4076.4	22038	27386	84885	31516
Lmjp002906	Rhamnetin-3-O-Glucoside	Flavonoids	Flavonols	990840	1208600	879020	268880	202230	282820	225930	411560	391000	217170	208180	140360	34047	53048	85770	63073	90574	74905	75668	84147	97222	45004	5678	46957	16230	44523	64217	54248	45087	67110	18851	6881.6	17479	18617	31694	54842
Hmcp002207	Isorhamnetin-7-O-glucoside (Brassicin)*	Flavonoids	Flavonols	259110	282430	291350	497140	418200	364710	205920	295130	185140	133440	262020	134070	91913	137700	242070	136010	97093	147330	175460	197190	243980	187460	147080	183980	45617	159570	37125	30535	21074	28852	130030	91679	201260	521570	311020	254210
Lmjp003044	Isorhamnetin-3-O-Glucoside*	Flavonoids	Flavonols	314220	404510	292800	455070	350310	350410	205340	302740	282340	127880	199330	126300	90612	119160	124640	68483	142400	117440	183730	254950	215080	172790	208310	187630	69056	111040	94825	27668	15125	14604	172290	91568	265020	471850	456350	305790
Lmjp003295	6-Methoxykaempferol-3-O-glucoside	Flavonoids	Flavonols	1671100	1780300	1218100	507750	366120	393300	336170	413200	395520	157360	348480	198870	17722	19379	39042	58807	105030	43480	102570	127770	72121	36172	30693	18747	28641	55082	99877	16229	25627	43842	37773	19250	61004	16028	47267	119710
Hmgp002036	Nepetin-7-O-glucoside(Nepitrin)	Flavonoids	Flavones	1506000	1895000	1214800	394780	337190	431520	290970	409910	393280	184410	177390	200430	33989	40818	70145	56704	66679	30610	36686	123850	77975	30707	36032	46308	14365	95952	48577	32055	42943	42155	45314	10954	28407	54998	35885	103540
pmb3042	Tricin-5-O-Glucoside	Flavonoids	Flavones	87620	67564	91235	116740	112440	55521	86259	139850	105910	66241	97934	80098	88149	112730	119970	46667	49058	59223	89075	107600	85667	76566	81375	139320	60801	80859	85697	20542	29636	28912	32724	33832	51787	99154	83532	103260
pmb0736	Tricin-7-O-Glucoside	Flavonoids	Flavones	1314900	1116600	1228700	255140	246490	240070	194160	264190	193620	120750	134250	108040	6404.6	8503.9	17905	10948	4769.1	5863.8	428120	439670	460920	185510	172650	165600	97478	138630	144100	24822	5178.1	36610	5753.4	9598.6	28414	17267	17117	23656
Lmhp206353	Tricin-4'-O-glucoside	Flavonoids	Flavones	347700	367800	348680	236790	198150	236240	109280	170940	156730	114340	193060	107420	16832	20536	15934	12136	4138.1	3874.3	411900	406800	436570	243540	238890	263090	62339	104130	112780	14251	6648.6	17651	24664	18294	33508	17003	21001	27144
pma0825	Chrysin-7-O-(6''-malonyl)glucoside	Flavonoids	Flavones	115510	94013	122140	26976	24130	20962	8501.4	14563	10375	6841.1	6068.7	2285.6	208.89	411.67	410.79	205.26	9	414.1	16273	22172	21360	13753	13664	9000.8	4153.3	7498.3	7289.8	1664.3	9	1261.2	206.69	418.95	1051.5	9	205.26	837.46
pmp000013	Eupatilin-7-O-glucoside	Flavonoids	Flavones	8984.3	6231.1	8708	13731	6602.5	4357.9	1595.1	10622	5038.6	7450.3	3172.4	1310.5	147010	151790	173880	119720	53768	51863	6087.5	1348.5	4486.7	3977	925.44	8249.7	532.16	6060.7	1054.6	3948.8	544.19	2102.1	3458	2988.6	12218	132340	88417	100440
pmb3041	Tricin-7-O-saccharic acid	Flavonoids	Flavones	45171	27152	52036	170170	155330	173100	168380	183240	164390	151110	174310	160660	46439	46361	70287	42507	59142	55344	161420	170740	149870	214780	198460	170110	91890	95982	122710	159410	126780	178400	193930	152880	292300	160110	190350	170130
pmb2979	Hesperetin-7-O-(6''-malonyl)glucoside	Flavonoids	Flavanones	33433	39448	39939	39395	34048	25005	32754	24409	25428	23412	24326	23414	9388.5	8844.8	12212	18696	2856.7	15873	63345	47927	45855	25904	29110	40000	20817	19488	21894	23017	15012	16767	40193	35372	59100	44004	66683	44211
pmb3114	Epicatechin-epiafzelechin	Flavonoids	Flavanols	429950	429190	482130	146710	121020	56403	82522	172290	111300	36511	62447	40235	1957	3638.9	4932.8	2459	382.91	2443.5	43653	38436	33940	21455	19909	14907	18869	27987	11408	4470.7	12886	1921.6	17373	20630	33674	28612	35765	22403
HJAP064	Isorhamnetin-3-O-(6''-malonylglucoside)	Flavonoids	Flavonols	45387	49429	32280	18639	17725	23587	23432	22668	21265	4322.3	12986	6426.3	14122	5864.7	9025.5	1511.8	7366.2	9	32554	50965	30959	8201.5	8816.8	15617	4433.3	4462	5271	3719.1	1411.3	676.82	3689.6	7398.4	10398	8955	5251.3	14957
Zmhp005139	Tamarixetin-3-O-(6''-malonyl)glucoside	Flavonoids	Flavonols	66682	64652	44585	18659	35295	35057	41892	51428	44219	28246	40371	22518	8532.5	8855.8	12135	2213.3	1870.9	3246.4	23131	20550	20768	3171.9	9729.2	4700.9	5710.1	14815	8970.8	930.47	3075.8	3258.1	5540.3	2137.5	4119.8	5765.4	5233.3	2761
mws1292	Isoschaftoside	Flavonoids	Flavonoid carbonoside	108680	112960	123430	7582.7	2756	14217	11336	10607	9894.3	17935	12156	17064	2001.1	20928	16623	12828	22931	3721.8	7566	9854	25005	4945	6620.2	12378	13005	21251	9871.7	1981	668.6	5901.8	18904	10681	36783	24045	32144	19783
Zmjp003463	"Vitexin-2""-O-xyloside"	Flavonoids	Flavonoid carbonoside	214090	129540	157220	74244	38865	70416	63876	70770	72371	34433	35209	24964	9616.8	14831	14868	3684.1	8118.9	9	320470	332780	317060	56237	76327	39909	15667	41530	33419	4461.3	3003.9	10436	20064	13472	30964	19689	38033	20399
pmf0381	Vicenin-3	Flavonoids	Flavonoid carbonoside	22173	20064	31698	6795.7	15012	2492.2	4787.2	2704.3	9083.4	4061.8	4071.7	6612.7	19358	2024.8	9880.7	8376	13402	10040	27905	23291	21094	6458.9	4023.3	9023.7	9315.7	12185	11446	2874.3	996.5	3577.7	23510	10032	43583	31578	25922	10495
Lmtp002474	Apigenin-6-C-(2''-glucosyl)arabinoside	Flavonoids	Flavonoid carbonoside	539610	421110	428380	66509	61119	63466	70474	85454	77357	73163	105920	73231	27575	51894	47387	86604	98705	77307	157590	121180	172320	46295	64901	55214	38513	68651	50547	5748.3	9	4727	99364	72368	177050	70066	75348	91768
Lmnp202580	Apigenin-8-C-(2''-xylosyl)glucoside*	Flavonoids	Flavonoid carbonoside	191090	141900	169090	63837	76196	50241	53890	84566	62069	58497	65236	55078	14743	17194	2951.3	5204.8	4746.5	5957	361930	340810	381130	52301	53351	56619	39703	35643	34827	2289	1433.8	11950	23063	7489.8	38885	30509	30633	30057
Lmnp102580	Apigenin-6-C-(2''-xylosyl)glucoside*	Flavonoids	Flavonoid carbonoside	197920	181290	192640	68703	64204	61964	51538	92989	74810	68292	74754	49049	15403	17918	15671	3712.1	6704.2	5291	315530	363970	443140	61676	49387	54479	31461	41778	41726	1492.7	750.42	1492.7	37234	20147	40344	36352	40494	36115
Smhp004476	Isovitexin-2''xyloside	Flavonoids	Flavonoid carbonoside	237270	185560	156040	66701	69462	68588	61240	91982	80212	52375	64701	54907	8092.2	11888	10775	11113	5160.1	6692	334050	382270	366970	74295	79290	47056	23842	42592	31994	6748	1476.7	11659	14170	10370	32615	30408	35988	48125
pmp000237	Apigenin-6-C-(2''-glucuronyl)xyloside	Flavonoids	Flavonoid carbonoside	158400	192190	100680	27940	24054	19901	9781.5	33839	29343	3009.9	8652.1	751.75	1437.1	749.25	2999.3	758.74	747.75	710.86	8264.4	15510	12953	1878.5	3756.9	1957.1	3039.7	2276.3	760.07	3053.3	3002.2	3866.3	6761.8	3089.3	7602.2	3035.9	4811.7	3376.8
Lmpp003930	Apigenin-7-O-(6''-p-Coumaryl)glucoside	Flavonoids	Flavones	384190	286800	298290	91826	38292	49594	18749	96055	44648	17245	33454	8969.8	2257.5	5233.3	2243.3	3025.2	3761.6	2250	54969	46265	17406	27075	5244.7	14278	7507.4	11677	11398	6002.9	9	3002.2	21405	4125	20468	9377	13647	12368
MWSmce498	Rhoifolin	Flavonoids	Flavones	554670	509380	447210	107380	53434	45987	21761	58561	47330	9778.8	32325	4488	1418.4	5266.7	14232	4516.3	1527.8	608.05	30213	34727	25094	15858	12009	11400	8308.8	12811	11401	5277.8	644.4	2265.2	18789	15829	41384	6763.3	9125	7842
pme0368	Apigenin-7-O-rutinoside (Isorhoifolin)	Flavonoids	Flavones	300340	328710	334580	62444	25908	44333	23289	59983	48831	12739	33031	6002	5264	5184.6	1506.5	4500	4125.5	3769.2	27440	24531	29633	8363.4	3003.9	6485.2	9074.5	16653	25816	696.86	625.63	1535	21825	14878	16742	9783.9	14274	8999.6
pme3227	Vitexin-2''-O-rhamnoside	Flavonoids	Flavonoid carbonoside	33670	14097	61774	9714.6	23109	11909	9690.1	6696.4	8935.2	5247.9	4526	6454.2	13313	8149.4	5748.7	12587	10371	3711.7	45099	51796	50435	14964	10486	13788	746.59	7427.3	8209.1	9	9	9	5220.1	4253.5	5945.2	3691.2	12724	4456.4
pme2493	Kaempferol-3,7-O-dirhamnoside (Kaempferitrin)	Flavonoids	Flavonols	924080	1012900	799700	200170	102750	138460	84715	201180	85471	15735	53181	24778	6016	6755	7488.2	5283.2	1520.1	8267.8	101360	79645	86164	41022	19882	10120	15464	50421	31827	8626	5999.2	6140.8	24016	31899	68241	38055	28558	28121
MWSHY0056	Naringenin-7-O-Rutinoside(Narirutin)	Flavonoids	Flavanones	86321	78371	66780	13986	25479	22392	9778.7	16400	15628	3211.3	6341	6452.3	1310.7	1354.5	1361.3	1764.5	636.2	2645.2	25440	18655	19221	12016	12620	9347.3	2049	3767.7	7943.6	1280.6	610.83	9	3143.7	3444.2	4694	4684.5	1714.5	2619.3
mws0046	Naringenin-7-O-Neohesperidoside(Naringin)	Flavonoids	Flavanones	129540	127250	145380	31001	29677	6704.9	9409.7	19832	13708	7187.1	13481	1408	3478.3	2411.3	478.85	964.48	1440.3	1488.3	33088	21255	36367	11207	9190.2	11724	2623.5	5235	5271	1436.7	892.45	456.54	1418.5	3978.5	919.13	19712	6454.6	17542
MWSHY0080	Luteolin-7-O-neohesperidoside (Lonicerin)	Flavonoids	Flavones	1378000	1241000	1011800	212510	213380	289930	205050	291940	275950	166840	185960	152900	25014	17465	14196	11102	12815	11412	98597	98806	112160	11997	20627	26790	12557	20418	23626	2310.7	9	1525.4	10224	4988.9	17549	5310	14303	9033.1
mws1073	Apigenin-6,8-di-C-glucoside (Vicenin-2)	Flavonoids	Flavonoid carbonoside	40385	30412	26724	14741	8215.5	12502	5712.5	9293.1	8461.4	6399.7	4306.3	3780.3	5990	1463	2030.8	9175.6	1514	11887	15033	21116	14578	516.65	2546.3	6247.5	4105.9	4589	3118	3173.6	1475.5	505.99	6110	6785.4	25987	2475.5	9148.5	5735.3
Lmsp004670	Kaempferol-3-O-glucoside-7-O-rhamnoside*	Flavonoids	Flavonols	1489200	1486300	1308900	273780	260960	287380	254110	374680	287580	191100	217050	165460	21069	17325	28322	7607.6	18025	15299	120840	122100	103610	22498	19351	13101	19230	19657	17039	1525.4	9	2287	10265	4634.3	18033	15372	17324	14580
MWSHY0061	Kaempferol-3-O-neohesperidoside	Flavonoids	Flavonols	350220	297740	255580	49497	58432	81899	54384	82385	90038	40902	57761	37465	29015	55773	60358	70226	55449	56606	135270	128120	171260	41683	58834	34348	52003	93815	75581	5019.5	1407	12685	36172	21304	61102	80325	99635	93364
MWSHY0050	Kaempferol-3-O-rutinoside(Nicotiflorin)*	Flavonoids	Flavonols	1462800	1602100	1257200	323620	215200	285930	281220	382720	303830	150690	214920	193890	34572	12844	28457	3373.4	3797.3	15283	124390	110560	123840	32311	22162	26890	19224	25427	53452	1543.4	9	9	19715	2273.9	9575.4	17518	18448	17665
Zmjp003291	Vitexin-2''-O-galactoside	Flavonoids	Flavonoid carbonoside	14222	1250.7	12644	1550.9	3603.2	3545	6229.7	3230.4	5901.5	1182.1	382.24	6564.4	98464	90091	106550	41523	55216	68311	2520.5	6241.4	10747	953.38	1314	1131.1	3705.6	2229.4	4491	1499.5	2455.4	895.44	18042	11490	22423	20158	38164	26644
Lmlp002990	Isosaponarin(Isovitexin-4'-O-glucoside)	Flavonoids	Flavonoid carbonoside	109790	107700	96124	46722	24594	42716	41293	44493	48549	43977	25621	34495	20657	16634	24601	11562	7100.3	10081	302780	313020	359230	52787	30970	58560	29994	34217	20027	2900.4	702.46	6429.3	19533	18774	47316	64131	33513	56665
MWSslk146	4'-O-Glucosylvitexin	Flavonoids	Flavonoid carbonoside	549440	426430	425380	155650	167590	152910	158050	208180	168040	133720	129220	135440	76059	75254	80809	42220	46303	23362	1139200	1369000	1519700	185210	205180	176040	69876	132050	127020	21900	7195.8	30612	101930	72855	142940	189810	185600	213140
pmp000593	Luteolin-7-O-rutinoside	Flavonoids	Flavones	83220	70567	55205	18934	17772	28457	24293	25783	19207	8646.3	14527	6575.8	11215	18872	18743	11222	19753	11301	25391	34010	46495	17697	22232	13264	11286	24603	22664	6403	9	3531.1	17138	8508.9	11364	33756	25343	18036
Lmmp003091	Quercetin-3-O-(4''-O-glucosyl)rhamnoside	Flavonoids	Flavonols	2062200	1554200	1360300	317250	290650	327910	269470	410730	380620	194120	192430	181840	14666	7594.2	15847	8731.4	10612	1322.8	251050	284310	287130	69085	41002	62817	40612	55912	63879	15326	1519.4	7653.2	16706	5308.9	13741	17320	27498	9835.1
pmn001583	Quercetin-3-O-robinobioside	Flavonoids	Flavonols	902320	782980	1058300	117690	122060	65596	66816	130120	144240	41446	58024	46254	12211	11153	4979	3315.7	5528.1	6717.3	118300	112490	90098	25696	22951	22115	12069	34248	22649	5597.4	1116.9	2207.5	4969.2	3294	16496	10498	27610	25459
pmb0711	Quercetin-7-O-rutinoside	Flavonoids	Flavonols	382130	393130	297030	51655	21643	54290	48843	44627	65104	15421	38634	25181	11260	16437	16905	22969	24449	19309	207410	248220	236160	56006	63705	55844	62081	126230	109600	4566.2	1953	10683	19198	16062	38972	43611	59945	62481
Lmjp002461	Quercetin-3-O-neohesperidoside	Flavonoids	Flavonols	368320	311250	296230	49716	34949	57471	45580	51612	45876	32500	33596	21359	13770	29713	21620	24218	20558	15940	167420	244830	245070	70389	64857	67606	68001	116540	115390	14273	9	13984	28172	23967	57810	49287	37355	58811
Hmpp002612	Luteolin-7-O-gentiobioside	Flavonoids	Flavones	15888	17654	7048	13382	8383.7	9980.3	11102	8094	9983	6757.6	9511	4752.3	1344.7	1334.3	613.07	1025.7	663.5	1223.3	26469	29848	17959	9357	6694	1980.5	2640.7	1321	7279.7	4057.3	577.8	3332	1276.7	2000.5	6676.5	686.48	1925	3334.8
mws0059	Quercetin-3-O-rutinoside (Rutin)	Flavonoids	Flavonols	789290	596740	907890	112730	105750	45190	67885	127810	93464	39781	48539	38614	8308.8	6116.7	11620	4716.4	3867.9	6674	100860	92817	70600	22778	19056	18834	19272	18773	28222	557.61	2232.1	1106.6	3873.4	3842.5	12064	15009	31791	7188.4
Lmsp004166	Quercetin-3-O-glucoside-7-O-rhamnoside	Flavonoids	Flavonols	340800	357180	242400	38206	34019	56509	37819	27081	34121	22695	34953	35197	22034	23233	23879	19548	24417	21196	202370	205430	243580	58690	84208	95903	73476	120760	98894	11148	1255	9632.6	23202	18018	52021	71475	50545	43087
HJAP120	Rhamnetin-3-O-Rutinoside	Flavonoids	Flavonols	5429200	5347200	5150100	1424000	1219400	1306800	1466400	1787500	1525300	768770	1019000	696090	22992	35937	36402	47055	54004	41955	300310	262140	376050	81950	84937	81510	62332	77533	93271	7629.5	3832.4	13810	10690	9901.2	34444	25266	36158	16748
Zmxp002867	Chrysoeriol-5,7-di-O-glucoside	Flavonoids	Flavones	122570	111100	103070	61809	66551	64958	117000	129700	151650	160940	196650	128960	3379.7	1302.7	930.38	19120	663.5	458.33	96873	102970	108690	100840	100160	84437	35020	87991	114970	24153	10614	26423	9	9	1289.3	2270.8	5886	11981
HJN051	Tamarixetin-3-O-rutinoside	Flavonoids	Flavonols	974610	795370	965180	313950	305050	120320	158160	355380	285560	110470	142090	105990	2693	3149.9	9101.4	10066	6300.2	7935	63113	86676	57351	16272	20495	17212	10831	15570	10631	532.47	537.79	517.65	2576.7	3085.5	3599.2	3665.1	13001	11286
Lmsp004721	Tamarixetin-3-O-glucoside-7-O-rhamnoside	Flavonoids	Flavonols	6761900	6163100	4794600	1625200	1384000	1612100	1340500	1711700	1517800	711250	1020300	822920	35086	28869	47429	51742	45967	51539	384370	321300	371790	91215	70696	75191	48636	92081	72991	9150.6	9	8439.3	23395	9795.8	33585	38775	28010	34275
Lmsp004045	Isorhamnetin-3-O-glucoside-7-O-rhamnoside	Flavonoids	Flavonols	3178700	3107500	2224200	580500	594700	666160	507620	714930	710730	299270	399450	275480	90179	149670	153210	204760	221050	225610	805900	787400	927090	261130	308670	284230	266360	480430	424860	43020	9487.9	71962	115660	89807	222360	199330	261240	211530
Lmsp003939	Isorhamnetin-3-O-galactoide-7-O-rhamnoside	Flavonoids	Flavonols	127030	179280	60665	26732	10716	29690	18384	16347	20816	5018	5816.6	3213.3	626.54	1147.2	1203.6	1635.7	1290	9	18852	14684	16298	5532.6	6198.9	3072.6	3049.8	1828.5	11229	1284.3	9	682.65	1018.8	650.35	657.01	1303	594.4	1246.6
MWSHY0135	Isorhamnetin-3-O-rutinoside (Narcissin)*	Flavonoids	Flavonols	6146800	5801300	5786500	1571100	1610700	1795300	1520400	1903000	1666300	840590	1210100	715430	27557	35765	51391	40376	64166	64894	403590	333150	430400	73843	103610	98355	75270	105120	96340	6803.4	9	14604	11414	12933	45451	32011	30760	19209
Lmnp002584	Hispidulin-8-C-(2''-O-glucosyl)glucoside	Flavonoids	Flavonoid carbonoside	50983	49069	65233	35988	39503	44579	44007	61821	71244	91530	94134	81879	17516	23126	21070	60348	31392	29203	53199	53365	68195	62371	63672	39811	50990	53451	57071	14645	2655.3	22003	7762.6	3044	10290	17183	25812	19409
MWSHY0064	Isorhamnetin-3-O-neohesperidoside*	Flavonoids	Flavonols	5878800	5683800	4476700	1231500	1104700	1356100	1278800	1610900	1402700	699000	598060	754730	13663	15272	35883	47170	36658	51491	270430	344860	269410	77894	79503	71349	52189	66185	83516	14330	1466.4	10746	21945	11340	36561	28921	25714	29243
Lmmp002463	Sexangularetin-3-O-glucoside-7-O-rhamnoside	Flavonoids	Flavonols	6232200	6463800	4688700	1492100	1139400	1492300	1517300	1617500	1341700	627210	803390	785330	23597	40297	33607	59202	59608	53158	311130	324050	343810	65461	72762	103920	68879	86398	65530	10636	9	18307	18964	12862	30538	20865	24165	29991
HJAP026	Chrysoeriol-6-C-glucoside-4'-O-glucoside	Flavonoids	Flavonoid carbonoside	78310	62299	45733	34534	38053	59587	58859	77814	50952	99072	125490	133470	16989	24532	36538	40113	32351	25996	43960	53385	56909	59710	66999	67491	38618	70173	44527	15240	8461.2	11757	8494.1	5402.3	6025.7	10744	16151	11453
Zmcp002666	Quercetin-3,7-Di-O-glucoside	Flavonoids	Flavonols	274530	156030	226790	862210	835520	656460	329170	770640	771220	71304	95361	64836	113810	216420	238220	185890	141610	107390	1347300	1236100	786040	1052300	1061300	1007100	82858	162160	148210	30773	1041.4	24619	14194	4921.9	24705	166120	111550	178340
pmb1312	Tricin-4'-O-(guaiacylglycerol)ether-7-O-glucoside	Flavonoids	Flavones	42216	29951	23132	13001	15344	14595	6655.5	11710	8901.4	7143.5	4185	9869.4	459.37	1430.5	433.38	863.94	9	9	23733	15465	24808	4332.8	5543.9	10877	12123	11289	7562.2	1269.2	9	9	9	9	2925.2	924.13	1328.5	476.52
Lmsp003881	Kaempferol-3-O-rutinoside-7-O-rhamnoside	Flavonoids	Flavonols	225150	229260	184290	75454	75299	60257	87081	76249	79351	62341	49103	58161	30534	42702	59590	69208	69552	66333	124160	164990	184880	47735	55297	35881	90930	73070	111160	11509	2812	15537	54881	35598	88604	82581	134280	92508
Lnrp102163	Quercetin-3-O-rutinoside-7-O-rhamnoside	Flavonoids	Flavonols	288510	278670	282490	67546	43264	58123	69839	59928	56632	25973	42701	24757	3287.7	5208.7	8535.3	7161.7	15146	27405	206450	128530	194710	70114	81639	74086	102330	145310	94375	23166	1953	21947	31425	20303	36246	17676	52957	74194
HJAP127	Quercetin-3-O-(2''-O-Rhamnosyl)rutinoside	Flavonoids	Flavonols	275420	215820	269550	46692	41799	64524	69595	56898	75040	51426	49501	46905	17713	34011	25843	32631	41520	41797	219940	243870	298240	88756	88161	92119	111840	158550	185630	19059	3940.7	19871	27986	21101	58238	76046	51545	47196
pmb0672	Isovitexin-7-O-(6''-feruloyl)glucoside	Flavonoids	Flavonoid carbonoside	67125	88278	81248	14561	14447	24126	24772	27031	21705	17486	10162	19071	2001.7	5624.5	724.11	10793	7192.4	9468	26779	35953	22317	2154.5	4382	12910	19358	26603	17996	2911.4	9	2811.4	6418.3	2121.5	3592.4	12238	5094.4	13791
pmb0592	Chrysoeriol-7-O-rutinoside-5-O-glucoside	Flavonoids	Flavones	36959	35373	35503	10990	8811.3	4389	12488	5921.6	13968	7328.3	7357.3	3690.5	5088.2	2228.5	3540.6	5276.5	8624.5	5795.4	13144	13898	7931.4	2154.5	5899.1	2154	8112.1	7208.9	10112	730.6	3690.7	730.6	1492.4	727.94	2178	5044.4	4374.8	8999.4
HJAP128	Isorhamnetin-3-O-rutinoside-7-O-rhamnoside	Flavonoids	Flavonols	2457000	2357300	2414700	708440	633570	885470	828430	963100	921310	466470	597260	412610	125010	192740	162540	229330	350100	244000	1044100	916150	926900	389450	387480	380440	561800	572850	592160	68118	10993	63973	160060	119450	258600	285700	290750	307070
pmb2947	Catechin-catechin-catechin	Flavonoids	Flavanols	1069100	1028600	1169900	167950	86420	50188	16464	103850	53556	2752.7	27604	7250.3	9315.2	2996.3	2459.7	1015.8	1510.5	4589.8	65335	48431	39534	15589	8089.8	8122.8	11408	13703	18037	9020.8	13420	1542.5	67622	42272	194780	65374	59270	50278
